# Supplementary material for: Microbiota continuum along the chicken oviduct and its association with host genetics and egg formation
Source: PubMed Central journal article supplement — Poult Sci. 2021 Mar 15;100(7):101104. doi: 10.1016/j.psj.2021.101104 (PMC8167817; doi:10.1016/j.psj.2021.101104), 2021-03-15
Supplement: mmc1.pdf [file mmc1.pdf]

**Table S1. Summary statistics of 16S rRNA sequencing**

| <b>Segments</b>     | <b>N</b>   | <b>Clean reads</b> | <b>Coverage range</b> | <b>Average of reads per sample</b> |
|---------------------|------------|--------------------|-----------------------|------------------------------------|
| <b>Cloaca</b>       | 43         | 2587887            | 32689 ~ 73206         | 60183                              |
| <b>Vagina</b>       | 55         | 3289560            | 38803 ~ 74390         | 59810                              |
| <b>Uterus</b>       | 54         | 3247856            | 34225 ~ 73746         | 60145                              |
| <b>Isthmus</b>      | 55         | 3114377            | 30858 ~ 71968         | 56625                              |
| <b>Magnum</b>       | 37         | 2172421            | 31774 ~ 74824         | 58714                              |
| <b>Infundibulum</b> | 48         | 2865423            | 33766 ~ 74648         | 59696                              |
| <b>Total</b>        | <b>292</b> | <b>17277524</b>    | <b>30858 ~ 74824</b>  | <b>59170</b>                       |

**Table S2. Relative abundance of the dominant microbial phyla in different segments**

| <b>Phylum</b>         | <b>Infundibulum</b> | <b>Magnum</b> | <b>Isthmus</b> | <b>Uterus</b> | <b>Vagina</b> | <b>Cloaca</b> |
|-----------------------|---------------------|---------------|----------------|---------------|---------------|---------------|
| <b>Actinobacteria</b> | 0.56%               | 2.71%         | 0.21%          | 0.14%         | 0.52%         | 17.11%        |
| <b>Bacteroidetes</b>  | 3.86%               | 3.79%         | 0.13%          | 0.15%         | 0.52%         | 1.32%         |
| <b>Firmicutes</b>     | 16.19%              | 21.56%        | 28.67%         | 38.16%        | 28.97%        | 57.35%        |
| <b>Fusobacteria</b>   | 0.00%               | 0.00%         | 0.02%          | 1.18%         | 3.84%         | 1.38%         |
| <b>Proteobacteria</b> | 79.21%              | 71.85%        | 70.93%         | 60.24%        | 66.04%        | 22.70%        |
| <b>Others</b>         | 0.18%               | 0.09%         | 0.05%          | 0.14%         | 0.12%         | 0.14%         |

**Table S3. Relative abundance of microbial genera at the six anatomical segments**

| Genus                                                                                                       | Infundibulum | Magnum | Isthmus | Uterus | Vagina | Cloaca |
|-------------------------------------------------------------------------------------------------------------|--------------|--------|---------|--------|--------|--------|
| <i>c_Actinobacteria;o_Actinomycetales;f_Actinomycetaceae;g_Actinomyces</i>                                  | 0            | 0      | 0       | 0      | 0.02%  | 3.49%  |
| <i>c_Actinobacteria;o_Corynebacteriales;f_Corynebacteriaceae;g_Corynebacterium</i>                          | 0.09%        | 0      | 0.03%   | 0.03%  | 0.16%  | 9.77%  |
| <i>c_Bacteroidia;o_Flavobacteriales;f_Weeksellaceae;g_Chryseobacterium</i>                                  | 3.78%        | 3.45%  | 0.11%   | 0      | 0.08%  | 0.01%  |
| <i>c_Bacilli;o_Bacillales;f_Planococcaceae;g_Kurthia</i>                                                    | 4.74%        | 0      | 1.10%   | 2.10%  | 0.01%  | 1.57%  |
| <i>c_Bacilli;o_Lactobacillales;f_Aerococcaceae;g_Aerococcus</i>                                             | 0.42%        | 3.10%  | 0.13%   | 2.81%  | 1.08%  | 1.08%  |
| <i>c_Bacilli;o_Lactobacillales;f_Enterococcaceae;g_Enterococcus</i>                                         | 5.25%        | 7.70%  | 15.43%  | 23.13% | 16.18% | 28.61% |
| <i>c_Bacilli;o_Lactobacillales;f_Vagococcaceae;g_Vagococcus</i>                                             | 1.17%        | 6.64%  | 1.27%   | 1.64%  | 1.41%  | 0.10%  |
| <i>c_Bacilli;o_Staphylococcales;f_Staphylococcaceae;g_Staphylococcus</i>                                    | 4.08%        | 3.53%  | 9.50%   | 6.56%  | 4.28%  | 1.87%  |
| <i>c_Clostridia;o_Peptostreptococcales-Tissierellales;f_Peptostreptococcales-Tissierellales;g_Gallicola</i> | 0            | 0      | 0       | 0.56%  | 1.92%  | 15.86% |
| <i>c_Fusobacteriia;o_Fusobacteriales;f_Fusobacteriaceae;g_Fusobacterium</i>                                 | 0            | 0      | 0.02%   | 1.18%  | 3.84%  | 1.38%  |
| <i>c_Alphaproteobacteria;o_Caulobacterales;f_Caulobacteraceae;g_Brevundimonas</i>                           | 1.83%        | 6.47%  | 1.84%   | 1.45%  | 0.93%  | 0.89%  |
| <i>c_Gammaproteobacteria;o_Aeromonadales;f_Aeromonadaceae;g_Aeromonas</i>                                   | 8.92%        | 2.66%  | 1.60%   | 0      | 3.15%  | 0.38%  |
| <i>c_Gammaproteobacteria;o_Burkholderiales;f_Comamonadaceae;_</i>                                           | 0.95%        | 0.49%  | 0.43%   | 2.66%  | 4.02%  | 0.71%  |
| <i>c_Gammaproteobacteria;o_Burkholderiales;f_Comamonadaceae;g_Comamonas</i>                                 | 3.59%        | 0      | 0.04%   | 0.35%  | 1.62%  | 1.51%  |
| <i>c_Gammaproteobacteria;o_Enterobacteriales;f_Enterobacteriaceae;_</i>                                     | 5.94%        | 10.08% | 7.16%   | 1.52%  | 4.16%  | 0.59%  |
| <i>c_Gammaproteobacteria;o_Enterobacteriales;f_Enterobacteriaceae;g_Escherichia-Shigella</i>                | 24.53%       | 25.39% | 40.18%  | 43.79% | 28.90% | 13.34% |
| <i>c_Gammaproteobacteria;o_Enterobacteriales;f_Erwiniaaceae;g_Pantoea</i>                                   | 0.01%        | 2.56%  | 1.43%   | 0.63%  | 0.12%  | 0      |
| <i>c_Gammaproteobacteria;o_Pseudomonadales;f_Moraxellaceae;g_Acinetobacter</i>                              | 9.02%        | 3.34%  | 5.57%   | 7.05%  | 3.53%  | 1.34%  |
| <i>c_Gammaproteobacteria;o_Pseudomonadales;f_Pseudomonadaceae;g_Pseudomonas</i>                             | 11.13%       | 11.77% | 7.77%   | 1.90%  | 13.10% | 0.92%  |
| <i>c_Gammaproteobacteria;o_Xanthomonadales;f_Xanthomonadaceae;g_Stenotrophomonas</i>                        | 12.89%       | 8.39%  | 4.22%   | 0.34%  | 4.63%  | 0.81%  |
| Others                                                                                                      | 1.64%        | 4.41%  | 2.20%   | 2.28%  | 6.87%  | 15.77% |

**Table S4. Spearman correlation between cloacal microbial genera**

| <b>Genus1</b>                        | <b>Genus2</b>            | <b>Abundance1</b> | <b>Abundance2</b> | <b>Phylum1</b> | <b>Phylum2</b> | <b>correlation</b> | <b>adj_P</b> | <b>Direction</b> |
|--------------------------------------|--------------------------|-------------------|-------------------|----------------|----------------|--------------------|--------------|------------------|
| <i>g_Corynebacterium</i>             | <i>g_Actinomyces</i>     | 10.12%            | 3.70%             | Actinobacteria | Actinobacteria | 0.41               | 4.70E-02     | positive         |
| <i>g_Brevibacterium</i>              | <i>g_Actinomyces</i>     | 0.07%             | 3.70%             | Actinobacteria | Actinobacteria | 0.42               | 4.15E-02     | positive         |
| <i>f_Aerococcaceae_</i>              | <i>g_Actinomyces</i>     | 0.16%             | 3.70%             | Firmicutes     | Actinobacteria | 0.63               | 1.42E-04     | positive         |
| <i>f_Aerococcaceae_</i>              | <i>g_Brevibacterium</i>  | 0.16%             | 0.07%             | Firmicutes     | Actinobacteria | 0.46               | 2.03E-02     | positive         |
| <i>f_Aerococcaceae_</i>              | <i>g_Corynebacterium</i> | 0.16%             | 10.12%            | Firmicutes     | Actinobacteria | 0.45               | 2.71E-02     | positive         |
| <i>g_Aerococcus</i>                  | <i>g_Kocuria</i>         | 0.99%             | 1.20%             | Firmicutes     | Actinobacteria | 0.59               | 6.07E-04     | positive         |
| <i>g_Facklamia</i>                   | <i>g_Actinomyces</i>     | 0.76%             | 3.70%             | Firmicutes     | Actinobacteria | -0.45              | 2.57E-02     | negative         |
| <i>g_Facklamia</i>                   | <i>g_Turicibacter</i>    | 0.76%             | 1.29%             | Firmicutes     | Firmicutes     | 0.43               | 3.31E-02     | positive         |
| <i>g_Facklamia</i>                   | <i>g_Kocuria</i>         | 0.76%             | 1.20%             | Firmicutes     | Actinobacteria | 0.54               | 3.55E-03     | positive         |
| <i>g_Facklamia</i>                   | <i>g_Aerococcus</i>      | 0.76%             | 0.99%             | Firmicutes     | Firmicutes     | 0.56               | 2.09E-03     | positive         |
| <i>g_Globicatella</i>                | <i>g_Actinomyces</i>     | 0.06%             | 3.70%             | Firmicutes     | Actinobacteria | 0.50               | 1.00E-02     | positive         |
| <i>g_Globicatella</i>                | <i>f_Aerococcaceae_</i>  | 0.06%             | 0.16%             | Firmicutes     | Firmicutes     | 0.53               | 4.24E-03     | positive         |
| <i>g_Lactobacillus</i>               | <i>g_Turicibacter</i>    | 1.26%             | 1.29%             | Firmicutes     | Firmicutes     | 0.44               | 3.25E-02     | positive         |
| <i>g_Streptococcus</i>               | <i>g_Brevibacterium</i>  | 0.87%             | 0.07%             | Firmicutes     | Actinobacteria | -0.50              | 1.00E-02     | negative         |
| <i>g_Streptococcus</i>               | <i>g_Turicibacter</i>    | 0.87%             | 1.29%             | Firmicutes     | Firmicutes     | 0.50               | 9.70E-03     | positive         |
| <i>g_Streptococcus</i>               | <i>g_Actinomyces</i>     | 0.87%             | 3.70%             | Firmicutes     | Actinobacteria | -0.41              | 4.57E-02     | negative         |
| <i>g_Streptococcus</i>               | <i>f_Aerococcaceae_</i>  | 0.87%             | 0.16%             | Firmicutes     | Firmicutes     | -0.41              | 4.39E-02     | negative         |
| <i>g_Staphylococcus</i>              | <i>g_Kocuria</i>         | 2.10%             | 1.20%             | Firmicutes     | Actinobacteria | 0.44               | 2.80E-02     | positive         |
| <i>g_Clostridium_sensu_stricto_1</i> | <i>g_Turicibacter</i>    | 0.02%             | 1.29%             | Firmicutes     | Firmicutes     | 0.47               | 1.73E-02     | positive         |
| <i>g_Clostridium_sensu_stricto_1</i> | <i>g_Romboutsia</i>      | 0.02%             | 1.15%             | Firmicutes     | Firmicutes     | 0.49               | 1.00E-02     | positive         |
| <i>g_Romboutsia</i>                  | <i>g_Lactobacillus</i>   | 1.15%             | 1.26%             | Firmicutes     | Firmicutes     | 0.50               | 1.00E-02     | positive         |
| <i>g_Romboutsia</i>                  | <i>g_Turicibacter</i>    | 1.15%             | 1.29%             | Firmicutes     | Firmicutes     | 0.94               | 1.82E-19     | positive         |
| <i>g_Romboutsia</i>                  | <i>g_Facklamia</i>       | 1.15%             | 0.76%             | Firmicutes     | Firmicutes     | 0.50               | 9.97E-03     | positive         |
| <i>g_Romboutsia</i>                  | <i>g_Streptococcus</i>   | 1.15%             | 0.87%             | Firmicutes     | Firmicutes     | 0.44               | 3.05E-02     | positive         |

| <b>Genus1</b>                  | <b>Genus2</b>                  | <b>Abundance1</b> | <b>Abundance2</b> | <b>Phylum1</b> | <b>Phylum2</b> | <b>correlation</b> | <b>adj_P</b> | <b>Direction</b> |
|--------------------------------|--------------------------------|-------------------|-------------------|----------------|----------------|--------------------|--------------|------------------|
| <i>g_Gallicola</i>             | <i>g_Enterococcus</i>          | 16.34%            | 29.37%            | Firmicutes     | Firmicutes     | -0.46              | 2.20E-02     | negative         |
| <i>g_Gallicola</i>             | <i>g_Lactobacillus</i>         | 16.34%            | 1.26%             | Firmicutes     | Firmicutes     | 0.42               | 4.31E-02     | positive         |
| <i>g_Gallicola</i>             | <i>g_Streptococcus</i>         | 16.34%            | 0.87%             | Firmicutes     | Firmicutes     | 0.50               | 1.00E-02     | positive         |
| <i>g_Helcococcus</i>           | <i>f_Aerococcaceae_</i>        | 0.52%             | 0.16%             | Firmicutes     | Firmicutes     | 0.68               | 1.02E-05     | positive         |
| <i>g_Helcococcus</i>           | <i>g_Corynebacterium</i>       | 0.52%             | 10.12%            | Firmicutes     | Actinobacteria | 0.43               | 3.31E-02     | positive         |
| <i>g_Helcococcus</i>           | <i>g_Actinomyces</i>           | 0.52%             | 3.70%             | Firmicutes     | Actinobacteria | 0.92               | 9.02E-17     | positive         |
| <i>g_Helcococcus</i>           | <i>g_Bacteroides</i>           | 0.52%             | 0.84%             | Firmicutes     | Bacteroidetes  | 0.42               | 3.75E-02     | positive         |
| <i>g_Helcococcus</i>           | <i>g_Globicatella</i>          | 0.52%             | 0.06%             | Firmicutes     | Firmicutes     | 0.50               | 1.00E-02     | positive         |
| <i>g_W5053</i>                 | <i>g_Actinomyces</i>           | 0.08%             | 3.70%             | Firmicutes     | Actinobacteria | 0.42               | 3.83E-02     | positive         |
| <i>g_W5053</i>                 | <i>f_Aerococcaceae_</i>        | 0.08%             | 0.16%             | Firmicutes     | Firmicutes     | 0.41               | 4.39E-02     | positive         |
| <i>g_W5053</i>                 | <i>g_Bacteroides</i>           | 0.08%             | 0.84%             | Firmicutes     | Bacteroidetes  | 0.53               | 3.97E-03     | positive         |
| <i>g_W5053</i>                 | <i>g_Helcococcus</i>           | 0.08%             | 0.52%             | Firmicutes     | Firmicutes     | 0.48               | 1.27E-02     | positive         |
| <i>g_Phascolarctobacterium</i> | <i>g_Enterococcus</i>          | 0.09%             | 29.37%            | Firmicutes     | Firmicutes     | -0.41              | 4.39E-02     | negative         |
| <i>g_Phascolarctobacterium</i> | <i>g_Gallicola</i>             | 0.09%             | 16.34%            | Firmicutes     | Firmicutes     | 0.43               | 3.31E-02     | positive         |
| <i>g_Phascolarctobacterium</i> | <i>g_W5053</i>                 | 0.09%             | 0.08%             | Firmicutes     | Firmicutes     | 0.49               | 1.00E-02     | positive         |
| <i>g_Phascolarctobacterium</i> | <i>g_Bacteroides</i>           | 0.09%             | 0.84%             | Firmicutes     | Bacteroidetes  | 0.82               | 5.13E-10     | positive         |
| <i>g_Veillonella</i>           | <i>g_Bacteroides</i>           | 0.05%             | 0.84%             | Firmicutes     | Bacteroidetes  | 0.47               | 1.73E-02     | positive         |
| <i>g_Veillonella</i>           | <i>g_Lactobacillus</i>         | 0.05%             | 1.26%             | Firmicutes     | Firmicutes     | 0.56               | 1.77E-03     | positive         |
| <i>g_Veillonella</i>           | <i>g_Phascolarctobacterium</i> | 0.05%             | 0.09%             | Firmicutes     | Firmicutes     | 0.41               | 4.39E-02     | positive         |
| <i>g_Fusobacterium</i>         | <i>g_Bacteroides</i>           | 1.48%             | 0.84%             | Fusobacteria   | Bacteroidetes  | 0.48               | 1.45E-02     | positive         |
| <i>g_Fusobacterium</i>         | <i>g_Gallicola</i>             | 1.48%             | 16.34%            | Fusobacteria   | Firmicutes     | 0.41               | 4.75E-02     | positive         |
| <i>g_Fusobacterium</i>         | <i>g_Phascolarctobacterium</i> | 1.48%             | 0.09%             | Fusobacteria   | Firmicutes     | 0.44               | 3.03E-02     | positive         |
| <i>g_Escherichia.Shigella</i>  | <i>g_Ralstonia</i>             | 13.15%            | 0.02%             | Proteobacteria | Proteobacteria | -0.43              | 3.52E-02     | negative         |
| <i>g_Gallibacterium</i>        | <i>g_Helcococcus</i>           | 0.12%             | 0.52%             | Proteobacteria | Firmicutes     | 0.44               | 2.89E-02     | positive         |
| <i>g_Gallibacterium</i>        | <i>g_Actinomyces</i>           | 0.12%             | 3.70%             | Proteobacteria | Actinobacteria | 0.46               | 1.93E-02     | positive         |

**Table S5. Spearman correlation between vaginal microbial genera**

| <b>Genus1</b>                        | <b>Genus2</b>            | <b>Abundance1</b> | <b>Abundance2</b> | <b>Phylum1</b> | <b>Phylum2</b> | <b>Correlation</b> | <b>adj_P</b> | <b>Direction</b> |
|--------------------------------------|--------------------------|-------------------|-------------------|----------------|----------------|--------------------|--------------|------------------|
| <i>g_Turicibacter</i>                | <i>g_Corynebacterium</i> | 0.21%             | 0.22%             | Firmicutes     | Actinobacteria | 0.41               | 1.30E-02     | positive         |
| <i>g_Aerococcus</i>                  | <i>g_Bacteroides</i>     | 1.06%             | 0.39%             | Firmicutes     | Bacteroidetes  | -0.42              | 9.65E-03     | negative         |
| <i>g_Enterococcus</i>                | <i>g_Corynebacterium</i> | 17.48%            | 0.22%             | Firmicutes     | Actinobacteria | 0.48               | 1.81E-03     | positive         |
| <i>g_Enterococcus</i>                | <i>g_Rhodococcus</i>     | 17.48%            | 0.04%             | Firmicutes     | Actinobacteria | 0.38               | 2.36E-02     | positive         |
| <i>g_Lactobacillus</i>               | <i>g_Turicibacter</i>    | 1.02%             | 0.21%             | Firmicutes     | Firmicutes     | 0.56               | 1.22E-04     | positive         |
| <i>g_Lactobacillus</i>               | <i>g_Corynebacterium</i> | 1.02%             | 0.22%             | Firmicutes     | Actinobacteria | 0.49               | 1.57E-03     | positive         |
| <i>g_Streptococcus</i>               | <i>g_Lactobacillus</i>   | 0.43%             | 1.02%             | Firmicutes     | Firmicutes     | 0.56               | 1.21E-04     | positive         |
| <i>g_Streptococcus</i>               | <i>g_Turicibacter</i>    | 0.43%             | 0.21%             | Firmicutes     | Firmicutes     | 0.58               | 5.38E-05     | positive         |
| <i>g_Staphylococcus</i>              | <i>g_Aerococcus</i>      | 3.82%             | 1.06%             | Firmicutes     | Firmicutes     | 0.56               | 1.17E-04     | positive         |
| <i>g_Clostridium_sensu_stricto_1</i> | <i>g_Streptococcus</i>   | 0.14%             | 0.43%             | Firmicutes     | Firmicutes     | 0.41               | 1.24E-02     | positive         |
| <i>g_Clostridium_sensu_stricto_1</i> | <i>g_Lactobacillus</i>   | 0.14%             | 1.02%             | Firmicutes     | Firmicutes     | 0.37               | 2.83E-02     | positive         |
| <i>g_Clostridium_sensu_stricto_1</i> | <i>g_Turicibacter</i>    | 0.14%             | 0.21%             | Firmicutes     | Firmicutes     | 0.56               | 1.02E-04     | positive         |
| <i>g_Clostridium_sensu_stricto_1</i> | <i>g_Romboutsia</i>      | 0.14%             | 0.36%             | Firmicutes     | Firmicutes     | 0.50               | 9.46E-04     | positive         |
| <i>g_Clostridium_sensu_stricto_1</i> | <i>g_Gallicola</i>       | 0.14%             | 2.11%             | Firmicutes     | Firmicutes     | 0.39               | 2.12E-02     | positive         |
| <i>g_Romboutsia</i>                  | <i>g_Streptococcus</i>   | 0.36%             | 0.43%             | Firmicutes     | Firmicutes     | 0.58               | 4.51E-05     | positive         |
| <i>g_Romboutsia</i>                  | <i>g_Corynebacterium</i> | 0.36%             | 0.22%             | Firmicutes     | Actinobacteria | 0.41               | 1.38E-02     | positive         |
| <i>g_Romboutsia</i>                  | <i>g_Turicibacter</i>    | 0.36%             | 0.21%             | Firmicutes     | Firmicutes     | 0.92               | 4.84E-22     | positive         |
| <i>g_Romboutsia</i>                  | <i>g_Lactobacillus</i>   | 0.36%             | 1.02%             | Firmicutes     | Firmicutes     | 0.62               | 9.34E-06     | positive         |
| <i>g_Gallicola</i>                   | <i>g_Bacteroides</i>     | 2.11%             | 0.39%             | Firmicutes     | Bacteroidetes  | 0.37               | 3.33E-02     | positive         |
| <i>g_Gallicola</i>                   | <i>g_Corynebacterium</i> | 2.11%             | 0.22%             | Firmicutes     | Actinobacteria | 0.41               | 1.25E-02     | positive         |
| <i>g_Fusobacterium</i>               | <i>g_Bacteroides</i>     | 4.62%             | 0.39%             | Fusobacteria   | Bacteroidetes  | 0.41               | 1.30E-02     | positive         |
| <i>g_Fusobacterium</i>               | <i>g_Gallicola</i>       | 4.62%             | 2.11%             | Fusobacteria   | Firmicutes     | 0.41               | 1.38E-02     | positive         |
| <i>g_Fusobacterium</i>               | <i>g_Corynebacterium</i> | 4.62%             | 0.22%             | Fusobacteria   | Actinobacteria | 0.37               | 3.34E-02     | positive         |

| <b>Genus1</b>                 | <b>Genus2</b>                 | <b>Abundance1</b> | <b>Abundance2</b> | <b>Phylum1</b> | <b>Phylum2</b> | <b>Correlation</b> | <b>adj_P</b> | <b>Direction</b> |
|-------------------------------|-------------------------------|-------------------|-------------------|----------------|----------------|--------------------|--------------|------------------|
| <i>g_Fusobacterium</i>        | <i>g_Lactobacillus</i>        | 4.62%             | 1.02%             | Fusobacteria   | Firmicutes     | 0.51               | 7.82E-04     | positive         |
| <i>g_Brevundimonas</i>        | <i>g_Corynebacterium</i>      | 0.77%             | 0.22%             | Proteobacteria | Actinobacteria | 0.38               | 2.76E-02     | positive         |
| <i>g_Brevundimonas</i>        | <i>g_Lactobacillus</i>        | 0.77%             | 1.02%             | Proteobacteria | Firmicutes     | 0.43               | 9.65E-03     | positive         |
| <i>g_Ralstonia</i>            | <i>g_Corynebacterium</i>      | 0.01%             | 0.22%             | Proteobacteria | Actinobacteria | 0.52               | 4.53E-04     | positive         |
| <i>g_Ralstonia</i>            | <i>g_Rhodococcus</i>          | 0.01%             | 0.04%             | Proteobacteria | Actinobacteria | 0.67               | 3.23E-07     | positive         |
| <i>g_Escherichia.Shigella</i> | <i>f_Enterobacteriaceae._</i> | 30.10%            | 4.12%             | Proteobacteria | Proteobacteria | -0.60              | 2.17E-05     | negative         |
| <i>g_Acinetobacter</i>        | <i>g_Escherichia.Shigella</i> | 4.20%             | 30.10%            | Proteobacteria | Proteobacteria | -0.48              | 1.83E-03     | negative         |
| <i>g_Acinetobacter</i>        | <i>f_Enterobacteriaceae._</i> | 4.20%             | 4.12%             | Proteobacteria | Proteobacteria | 0.45               | 5.23E-03     | positive         |
| <i>g_Pseudomonas</i>          | <i>g_Escherichia.Shigella</i> | 12.91%            | 30.10%            | Proteobacteria | Proteobacteria | -0.51              | 7.54E-04     | negative         |

**Table S6. The difference of eggshell color-L value between the birds with the highest and lowest vaginal *Staphylococcus* abundance.**

| Age (weeks) | The highest abundance | The lowest abundance | adj_ <i>P</i> |
|-------------|-----------------------|----------------------|---------------|
| 36          | 56.89 ± 1.76          | 59.31 ± 2.23         | 0.015         |
| 56          | 58.00 ± 1.63          | 60.72 ± 1.90         | 0.003         |
| 72          | 58.85 ± 2.70          | 61.91 ± 2.86         | 0.029         |
| 80          | 60.55 ± 2.81          | 61.42 ± 3.23         | 0.528         |
| 90          | 54.47 ± 2.59          | 57.86 ± 3.70         | 0.039         |

**Table S7. The difference of eggshell color-L value between the birds with the highest and lowest vaginal *Ralstonia* abundance.**

| Age (weeks) | The highest abundance | The lowest abundance | adj_ <i>P</i> |
|-------------|-----------------------|----------------------|---------------|
| 36          | 56.95 ± 3.01          | 59.13 ± 1.56         | 0.057         |
| 56          | 58.49 ± 2.58          | 60.89 ± 2.09         | 0.035         |
| 72          | 59.23 ± 2.65          | 62.06 ± 1.94         | 0.014         |
| 80          | 58.41 ± 2.38          | 61.51 ± 2.43         | 0.010         |
| 90          | 53.62 ± 3.35          | 57.95 ± 3.79         | 0.015         |

**Table S8. The difference of egg number between the birds with the highest and lowest vaginal *Romboutsia* abundance.**

| Age (weeks) | The highest abundance | The lowest abundance | adj_ <i>P</i> |
|-------------|-----------------------|----------------------|---------------|
| 36          | 108.9 ± 7.34          | 115.8 ± 6.56         | 0.040         |
| 56          | 238.5 ± 9.88          | 247.6 ± 5.74         | 0.021         |
| 72          | 340.4 ± 12.44         | 352.2 ± 6.8          | 0.017         |
| 80          | 390.1 ± 15.02         | 402.5 ± 7.93         | 0.033         |
| 90          | 446.6 ± 19.84         | 460.5 ± 11.15        | 0.069         |

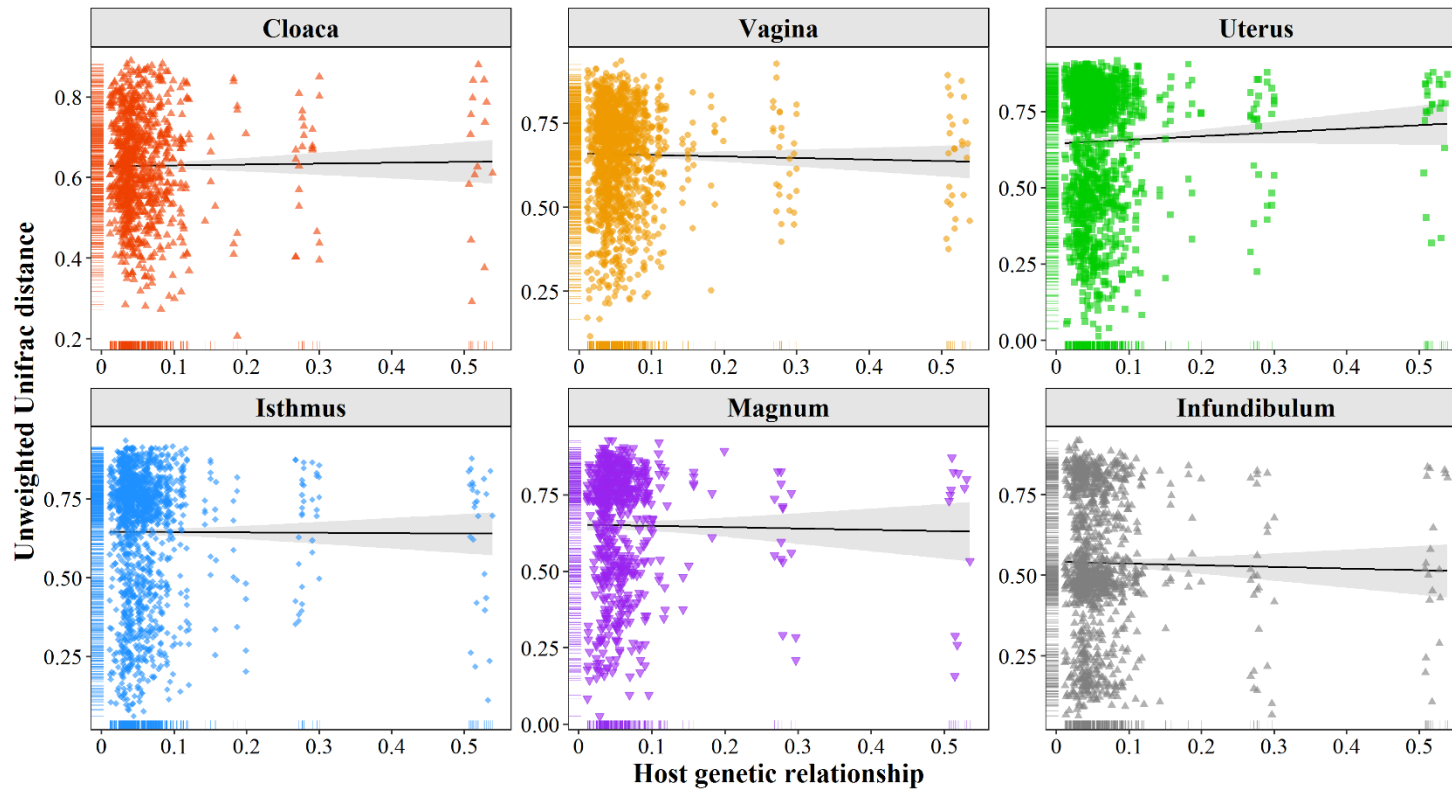

**Figure S1.** Relationship between host genetic relationship and unweighted UniFrac distance on the six segments of reproductive tract.
